# Supplementary material for: Endothelial cells of pulmonary origin display unique sensitivity to the bacterial endotoxin lipopolysaccharide
Source: PubMed Central journal article supplement (PMC9017980; doi:10.14814/phy2.15271), 2022-04-19

# Supplemental Figure 1.

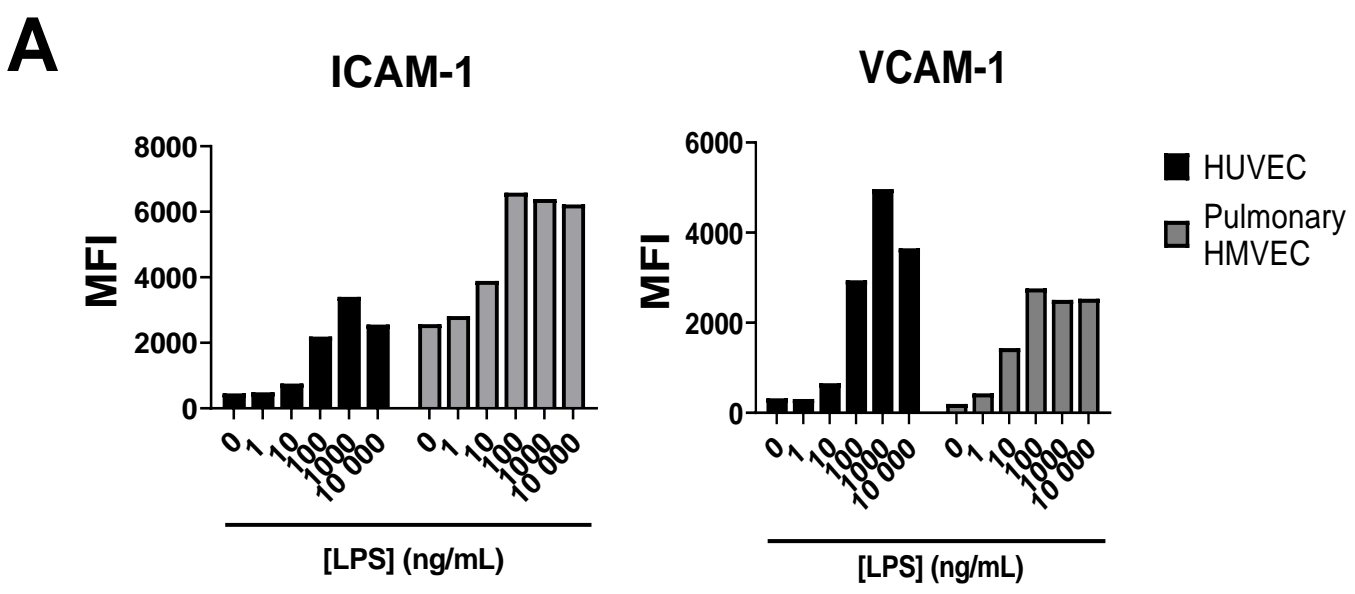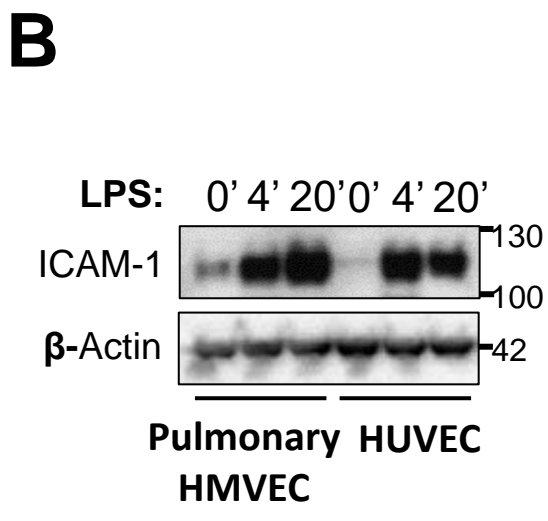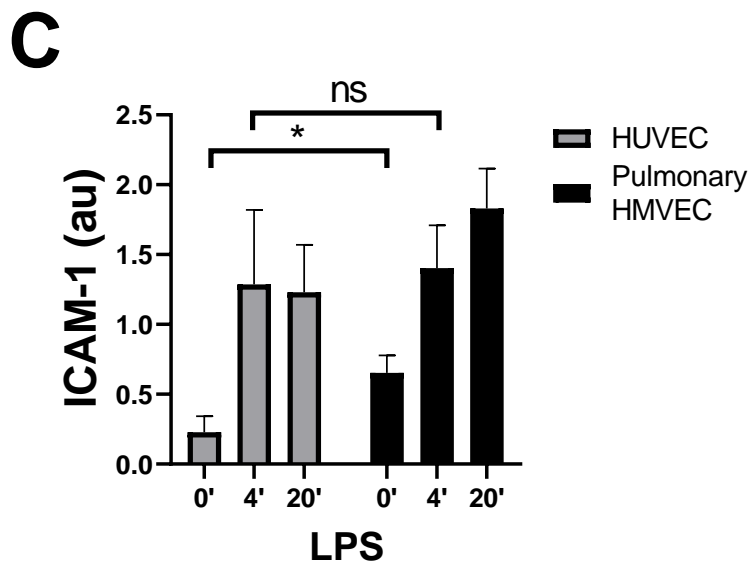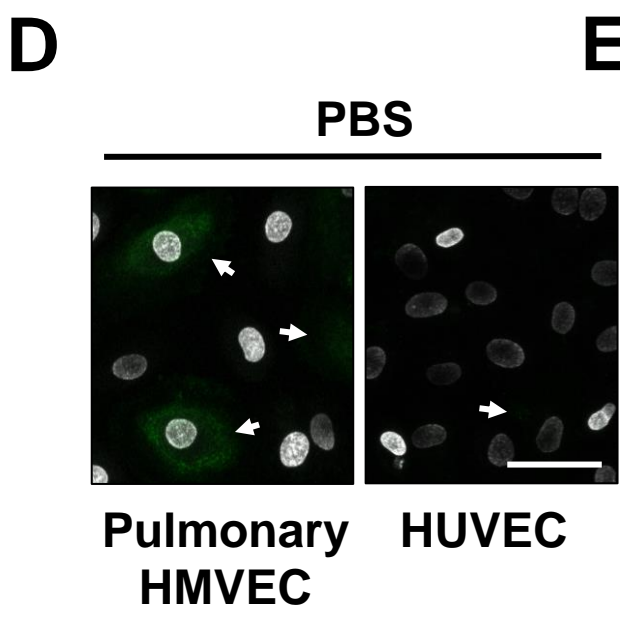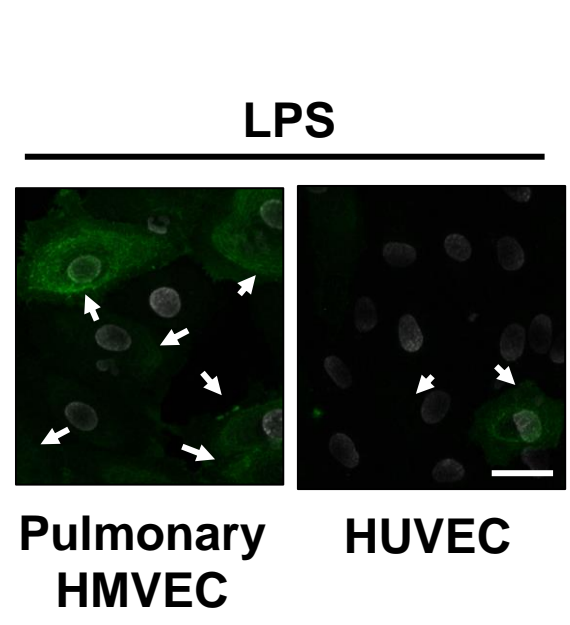

# Supplemental Figure 2.

## A

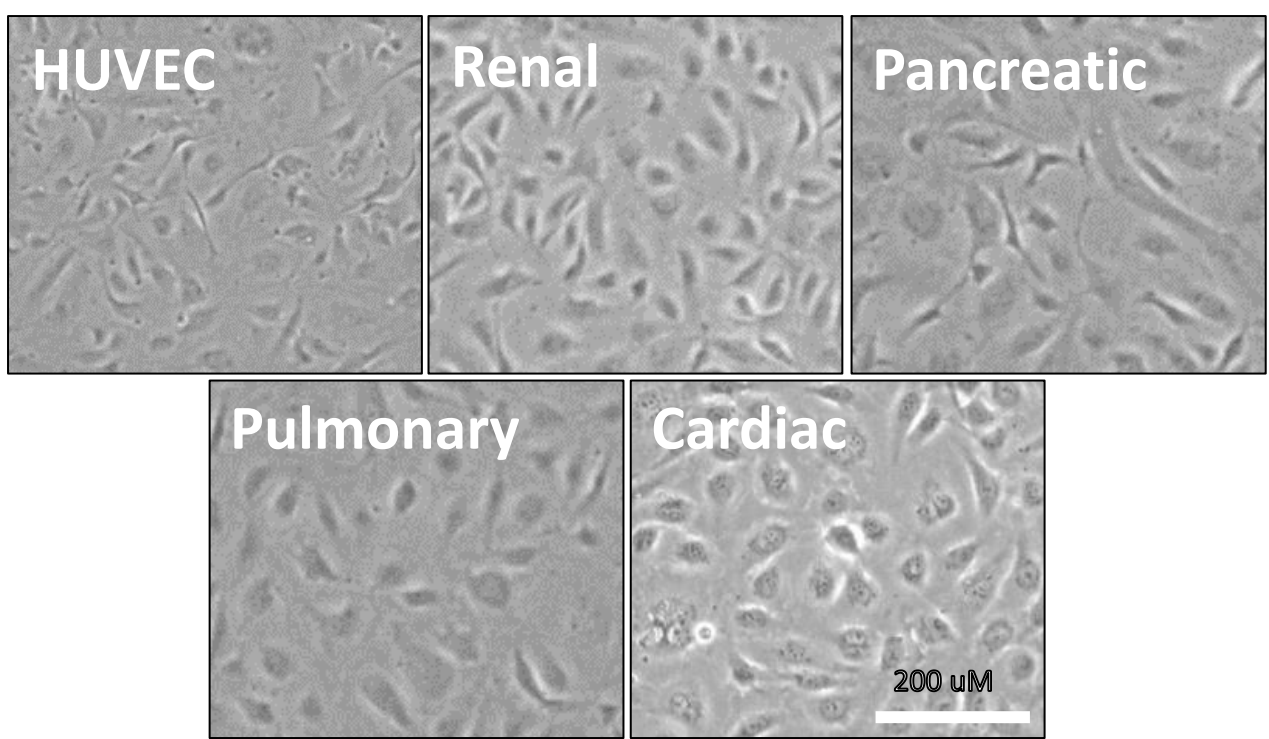

## B

### LPS-treated HMVEC

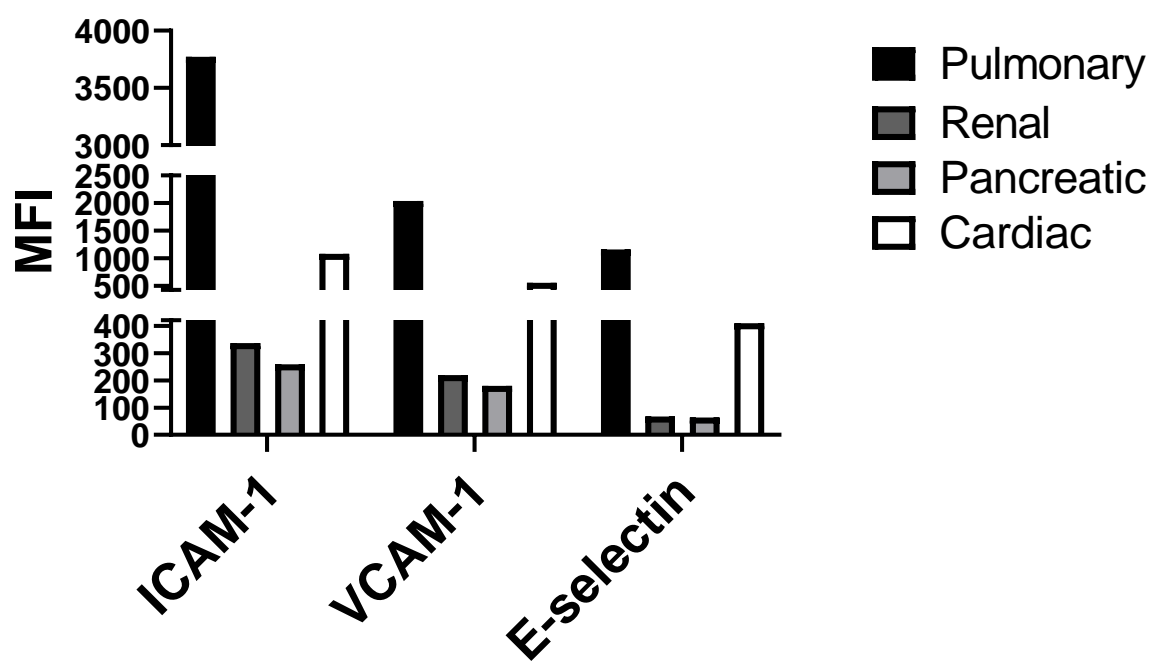

# Supplemental Figure 3.

## A

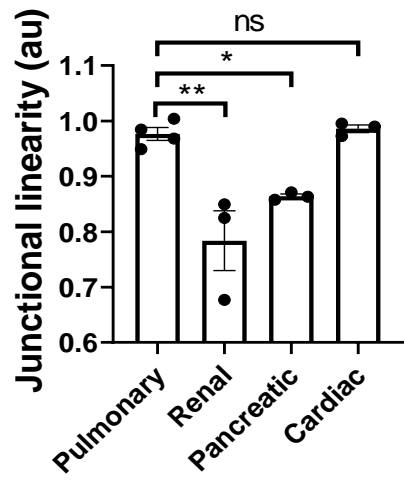

## B

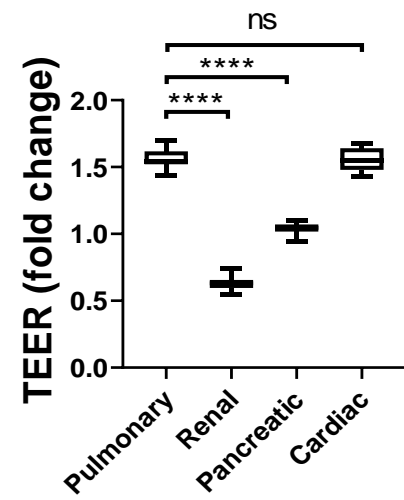

## C

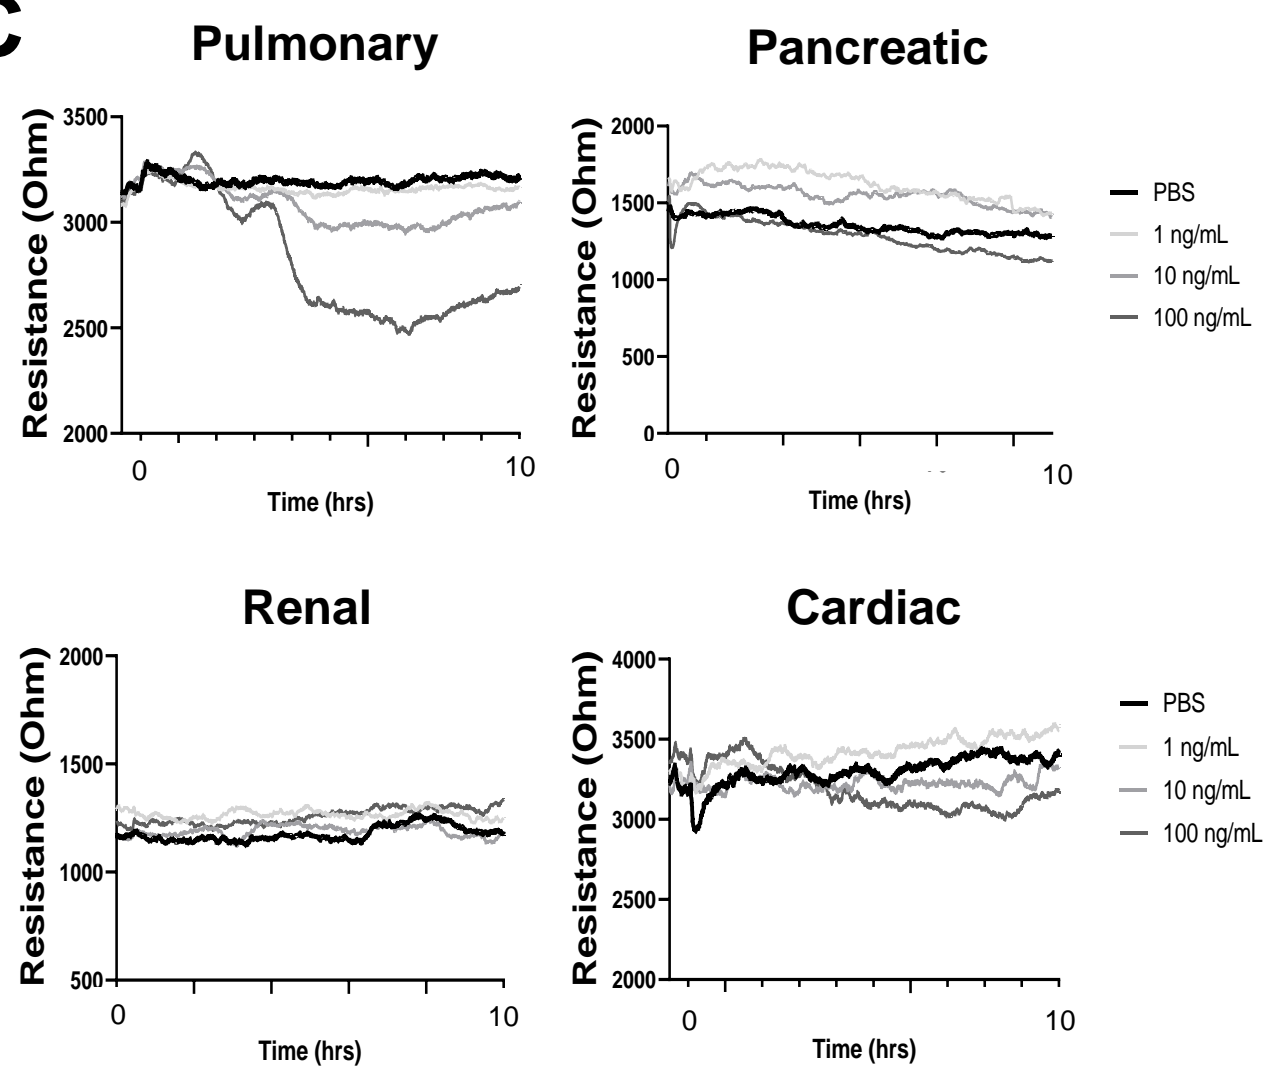

# Supplemental Figure 4.

## A

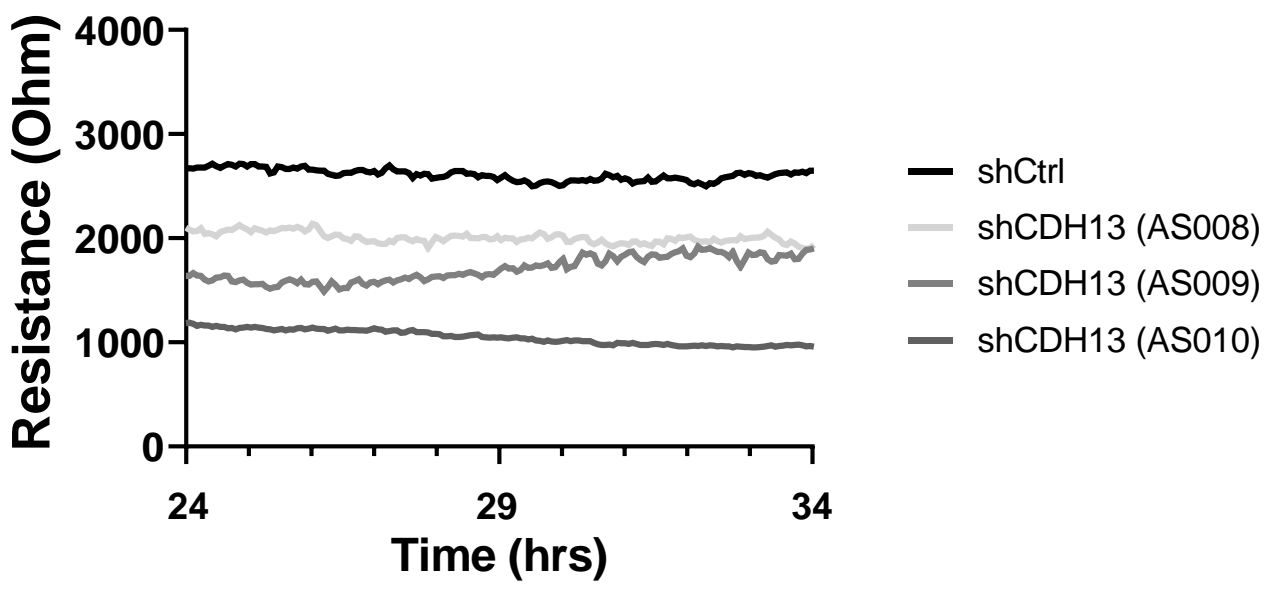

Supplement: PHY2-10-e15271-s002.pdf [file PHY2-10-e15271-s002.pdf]
